# Supplementary material
Source: PubMed Central journal article supplement (PMC5715696)
Supplement: jcdd-03-00006-s001.pdf [file jcdd-03-00006-s001.pdf]

## Supplementary Materials: Modeling *GATAD1*-Associated Dilated Cardiomyopathy in Adult Zebrafish

Jingchun Yang <sup>1</sup>, Sahrish Shah <sup>1</sup>, Timothy M. Olson <sup>2,3</sup> and Xiaolei Xu <sup>1,2,\*</sup>

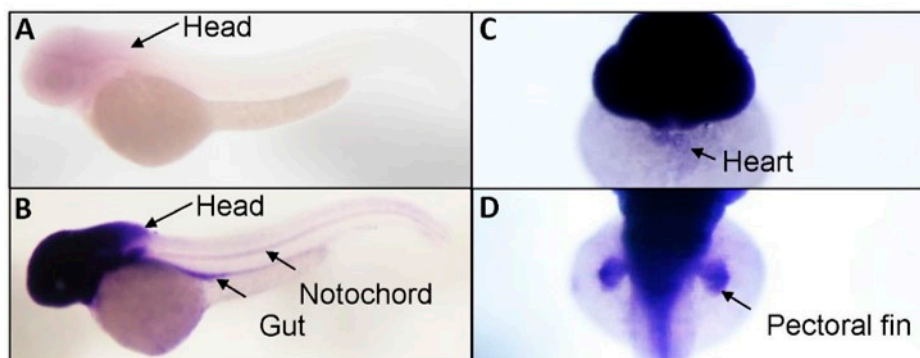

**Figure S1.** Tissue-specific expression of *gatad1* transcripts was revealed by *in situ* hybridization in 2 dpf zebrafish embryos. Short-time stain only revealed head expression of *gatad1* (A), but long time stain show *gatad1* expression in gut, notochord, heart and pectoral fin (B–D).
